# Supplementary material for: Insights of the efficient hydrogen evolution reaction performance in bimetallic Au4Cu2 nanoclusters
Source: Royal Society of Chemistry journal article supplement (doi:10.1039/d3nr05445d), 2023-12-26
Supplement: d3nr05445d1.pdf [file d3nr05445d1.pdf]

Electronic Supplementary Information

## **Insights of the Efficient Hydrogen Evolution Reaction Performance in Bimetallic Au<sub>4</sub>Cu<sub>2</sub> Nanoclusters**

Aarti Devi<sup>a</sup>, Harpriya Minhas<sup>b</sup>, Lipipuspa Sahoo<sup>a</sup>, Rashi<sup>a</sup>, Saniya Gratiouse<sup>c</sup>, Amitabha Das<sup>b</sup>, Sukhendu Mandal<sup>c</sup>,  
Biswarup Pathak<sup>b\*</sup>, Amitava Patra<sup>a,d\*</sup>

<sup>a</sup>*Institute of Nano Science and Technology, Knowledge City, Sector 81, Mohali 14036, India*

<sup>b</sup>*Department of Chemistry, Indian Institute of Technology (IIT) Indore, Indore, Madhya Pradesh, 453552, India*

<sup>c</sup>*School of Chemistry, Indian Institute of Science Education and Research Thiruvananthapuram, Thiruvananthapuram, Kerala-695551, India*

<sup>d</sup>*School of Materials Sciences, Indian Association for the Cultivation of Science, Jadavpur,  
Kolkata-700032, India*

\*Author to whom correspondence should be addressed; E-mail: [msap@iacs.res.in](mailto:msap@iacs.res.in), [biswarup@iiti.ac.in](mailto:biswarup@iiti.ac.in), Phone:  
(91)-33-2473-4971, Fax: (91)-33-2473

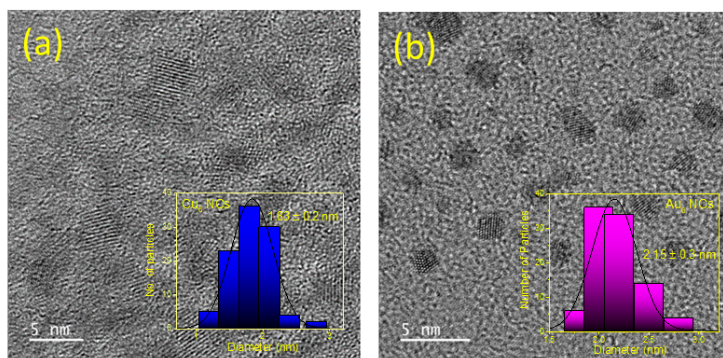

**Figure S1:** TEM image of (a) Cu<sub>6</sub> NCs (b) Au<sub>6</sub> NCs (Insets show the corresponding particle size distribution).

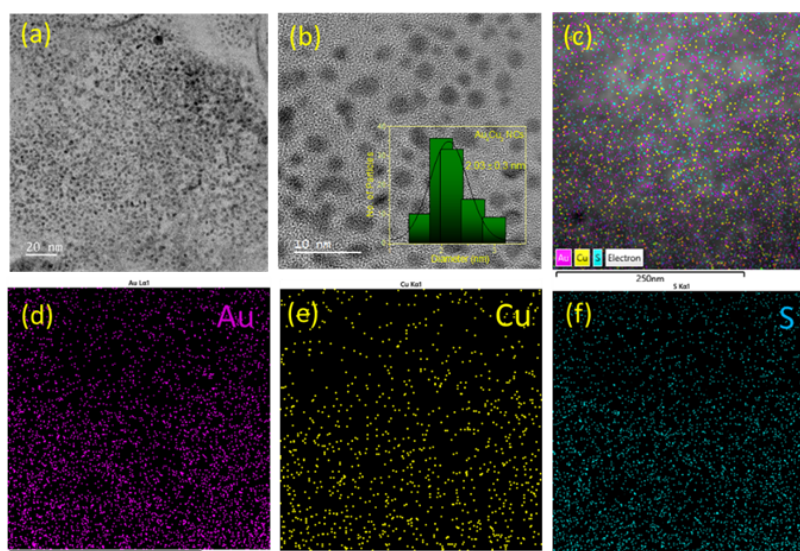

**Figure S2:** (a, b) TEM and HRTEM images of Au<sub>4</sub>Cu<sub>2</sub> NCs (Inset shows the corresponding particle size distribution) and (c) corresponding elemental mapping showing the presence of d) Au e) Cu and f) S

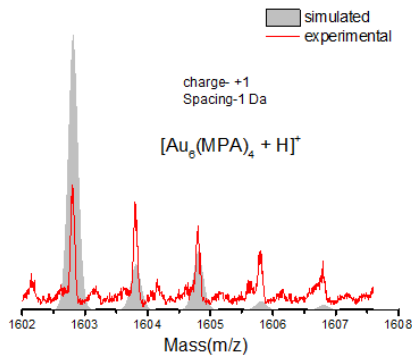

**Figure S3:** Isotopic Distribution (simulated and experimental) of peak \* with formula  $[\text{Au}_6(\text{MPA})_4 + \text{H}]^+$

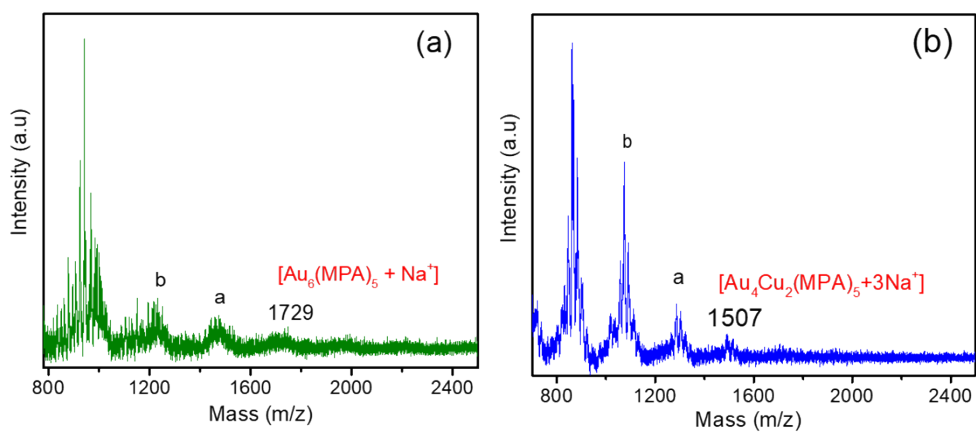

**Figure S4:** MALDI-MS analysis of (a) Au NCs and (b) AuCu NCs

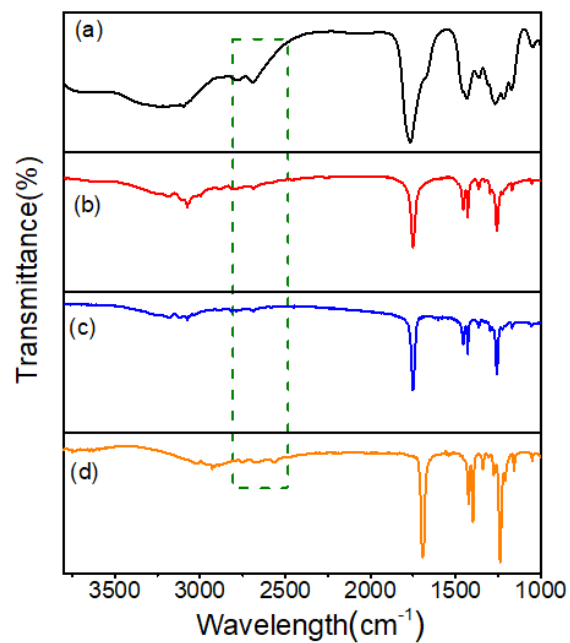

**Figure S5:** FTIR analysis of (a) MPA (b) Cu<sub>6</sub> NCs (c) Au<sub>6</sub> NCs, and (d) Au<sub>4</sub>Cu<sub>2</sub> NCs

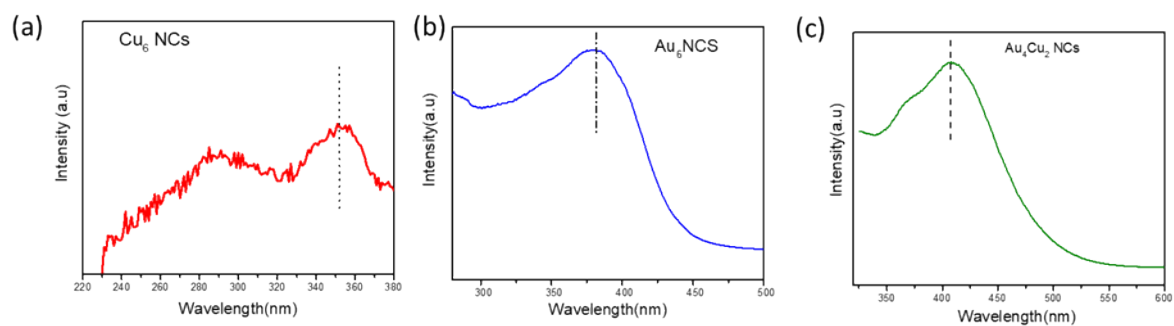

**Figure S6:** PLE spectra of (a)Cu<sub>6</sub> NCs (b) Au<sub>6</sub> NCs and (c) Au<sub>4</sub>Cu<sub>2</sub> NCs

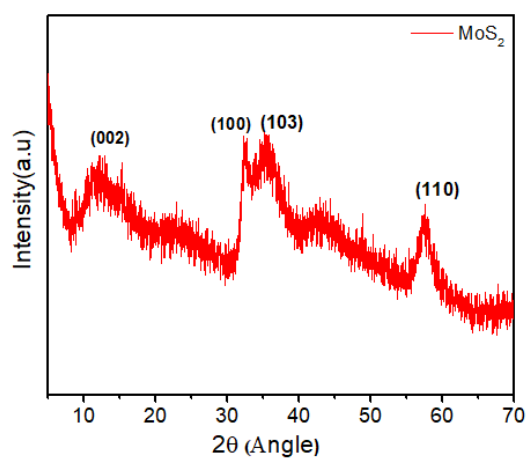

**Figure S7:** Powder X-ray Diffraction pattern of MoS<sub>2</sub>

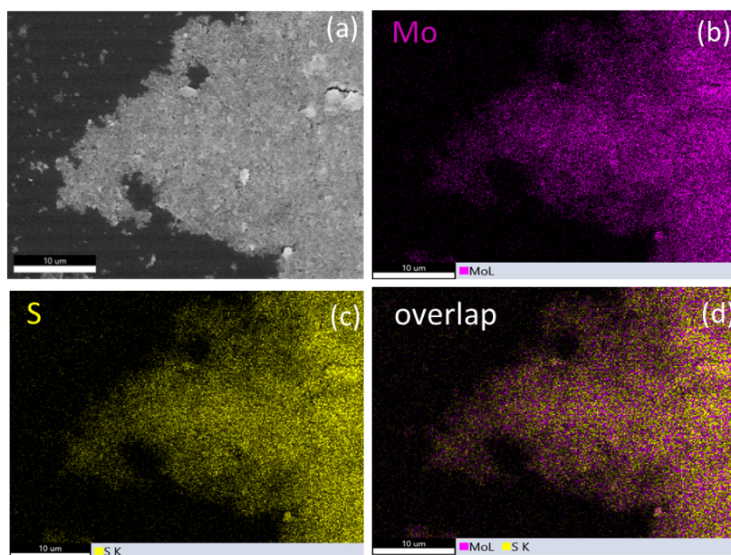

**Figure S8:** (a) SEM image of MoS<sub>2</sub> and corresponding elemental mapping of (b) Mo (c) S (d) overlap of Mo and S.

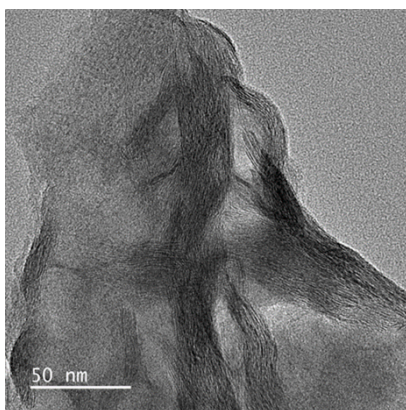

**Figure S9:** TEM image of MoS<sub>2</sub>.

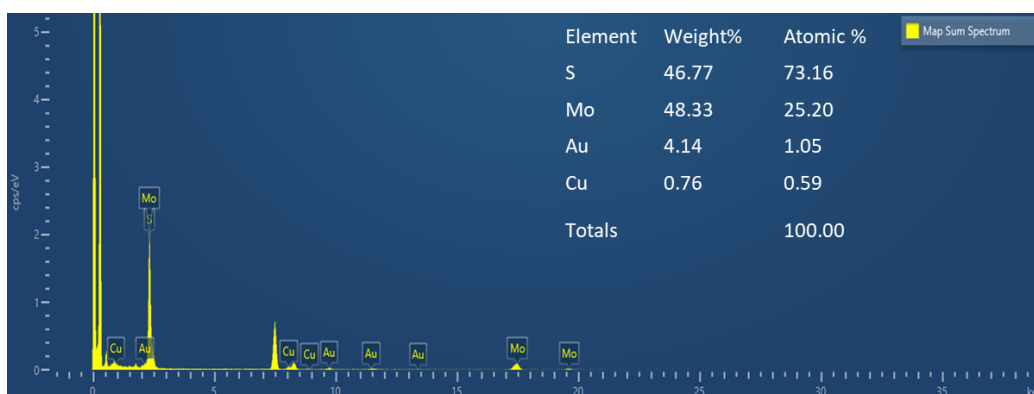

**Figure S10:** HRTEM-EDX spectrum of  $\text{Au}_4\text{Cu}_2/\text{MoS}_2$  showing the presence of Au, Cu, Mo, and S (inset shows the contents of the elements).

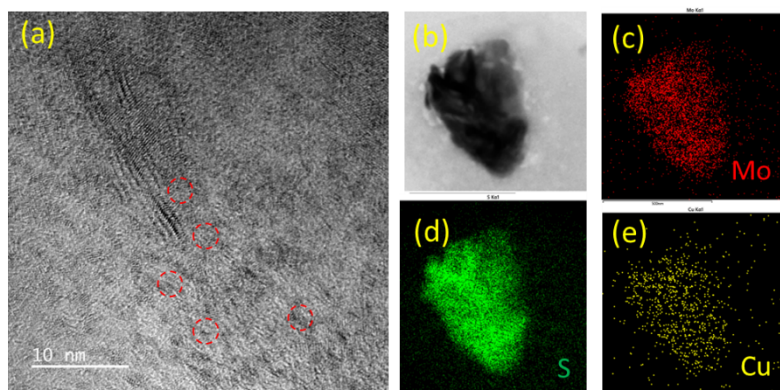

**Figure S11:** (a,b) TEM images of  $\text{Cu}/\text{MoS}_2$  and (c) corresponding elemental mapping showing the presence of d) Mo e) S f) Cu

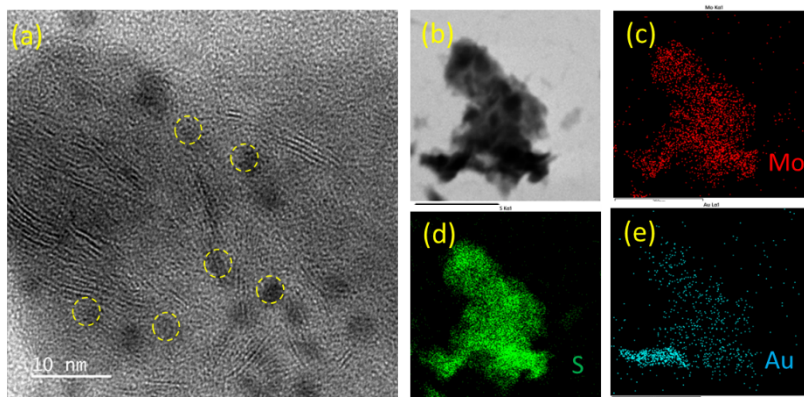

**Figure S12:** (a,b) TEM images of  $\text{Au}/\text{MoS}_2$  and (c) corresponding elemental mapping showing the presence of d) Mo e) S f) Au

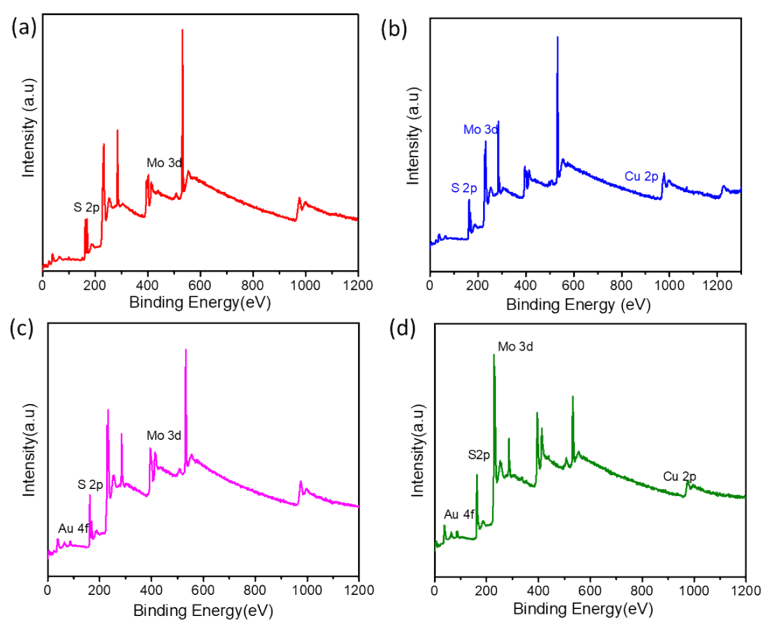

**Figure S13:** XPS survey spectrum of (a) MoS<sub>2</sub> (b) Cu<sub>6</sub>/MoS<sub>2</sub> (c) Au<sub>6</sub>/MoS<sub>2</sub> (d) and Au<sub>4</sub>Cu<sub>2</sub>/MoS<sub>2</sub>

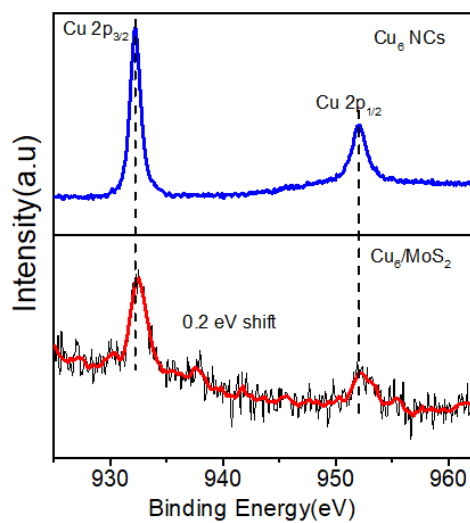

**Figure S14:** XPS analysis of Cu 2p in Cu<sub>6</sub> NCs and Cu<sub>6</sub>/MoS<sub>2</sub> composite.

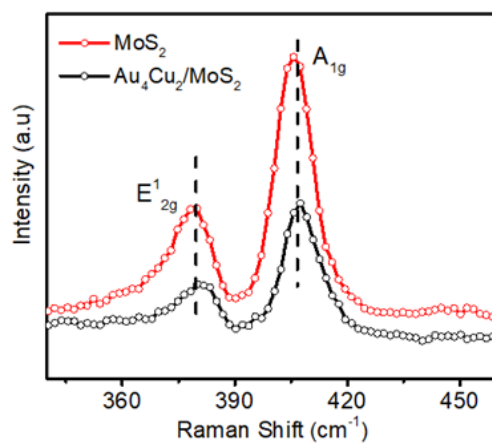

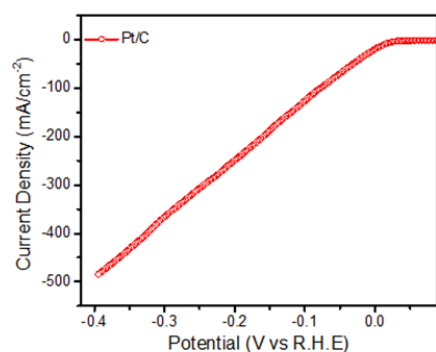

**Figure S15:** Raman spectra of MoS<sub>2</sub> and Au<sub>4</sub>Cu<sub>2</sub>/MoS<sub>2</sub>

**Figure S16:** HER polarization curve of Pt/C.

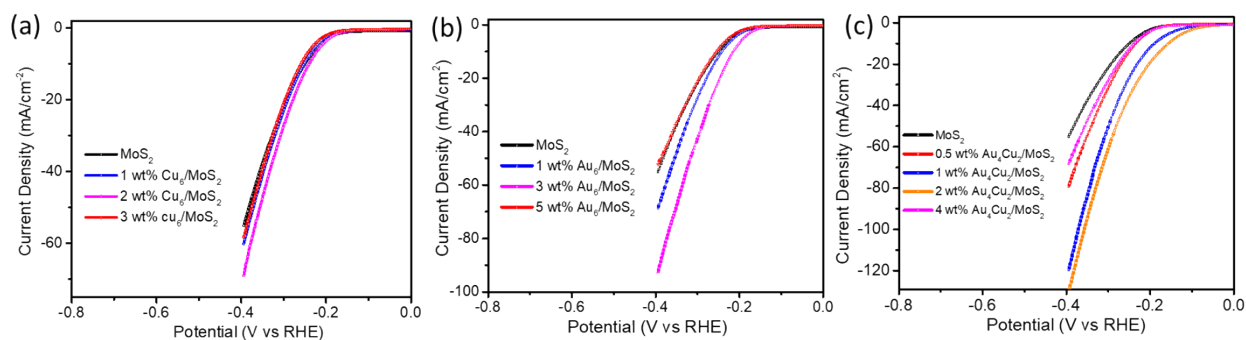

**Figure S17** (a) HER polarization curve with different loadings recorded at a scan rate of 10 mV/sec of (a) Cu<sub>6</sub>/MoS<sub>2</sub> (b) Au<sub>6</sub>/MoS<sub>2</sub> and (c) Au<sub>4</sub>Cu<sub>2</sub>/MoS<sub>2</sub>

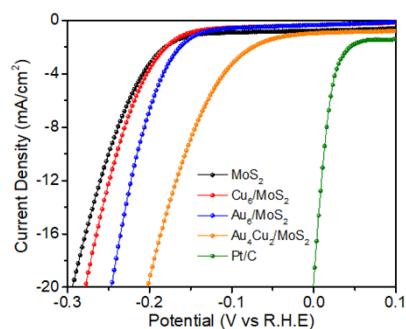



**Figure S18:** Polarization curves of NCs encapsulated over MoS<sub>2</sub> towards HER recorded at a scan rate of 10 mV/sec

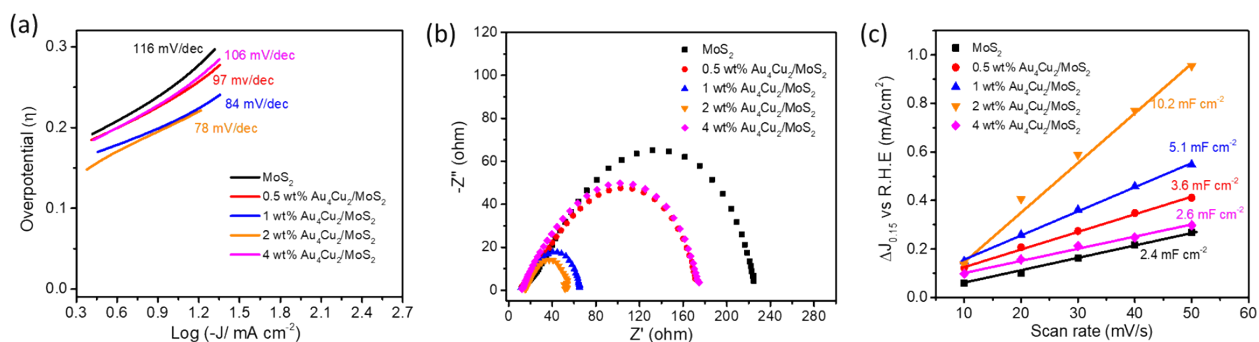

**Figure S19:** Electrocatalytic performance of Au<sub>4</sub>Cu<sub>2</sub>/MoS<sub>2</sub> with different loadings towards HER (a) Tafel slope derived from an early stage of HER polarization curve (b) Nyquist plots (c) Comparative C<sub>dl</sub> plot as a function of scan rate.

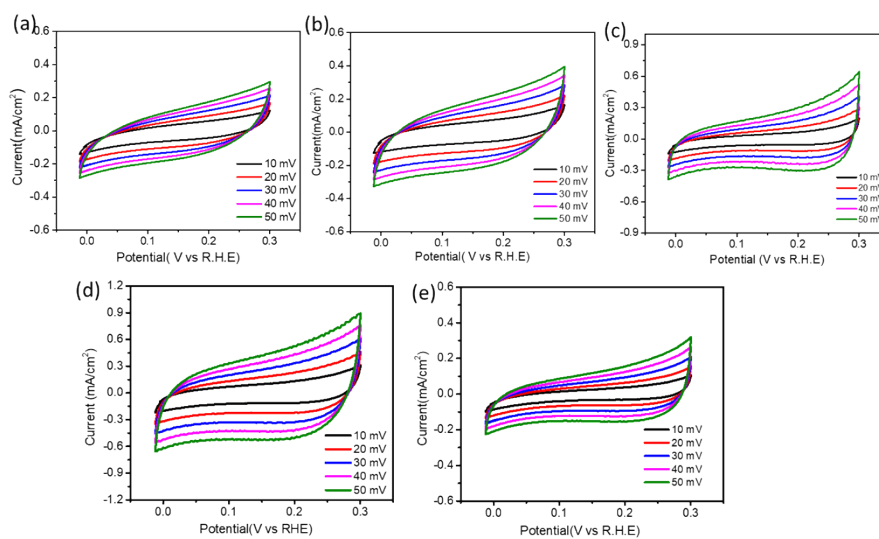

**Figure S20:** Cyclic voltammograms curve of (a) MoS<sub>2</sub> (b) 0.5 wt% Au<sub>4</sub>Cu<sub>2</sub>/MoS<sub>2</sub> (c) 1 wt% Au<sub>4</sub>Cu<sub>2</sub>/MoS<sub>2</sub> (d) 2 wt% Au<sub>4</sub>Cu<sub>2</sub>/MoS<sub>2</sub> (e) 4 wt% Au<sub>4</sub>Cu<sub>2</sub>/MoS<sub>2</sub> in the potential window of 0.0 V- 0.3 V vs. RHE at different scan rates.

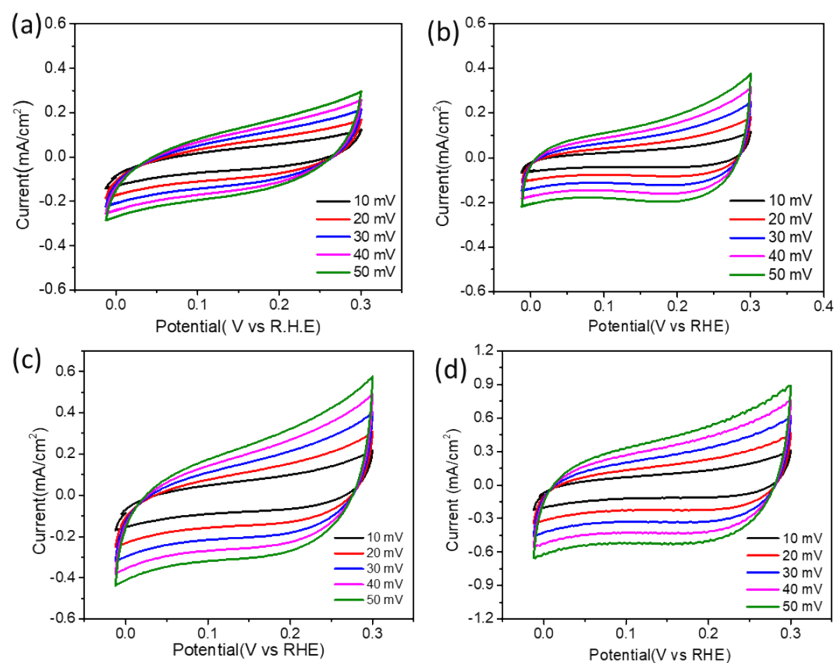

**Figure S21:** Cyclic voltammograms curve of (a) MoS<sub>2</sub> (b) Cu<sub>6</sub>/MoS<sub>2</sub> (c) Au<sub>6</sub>/MoS<sub>2</sub> (d) Au<sub>4</sub>Cu<sub>2</sub>/MoS<sub>2</sub> in the potential window of 0.0 V- 0.3 V vs. RHE at different scan rates.

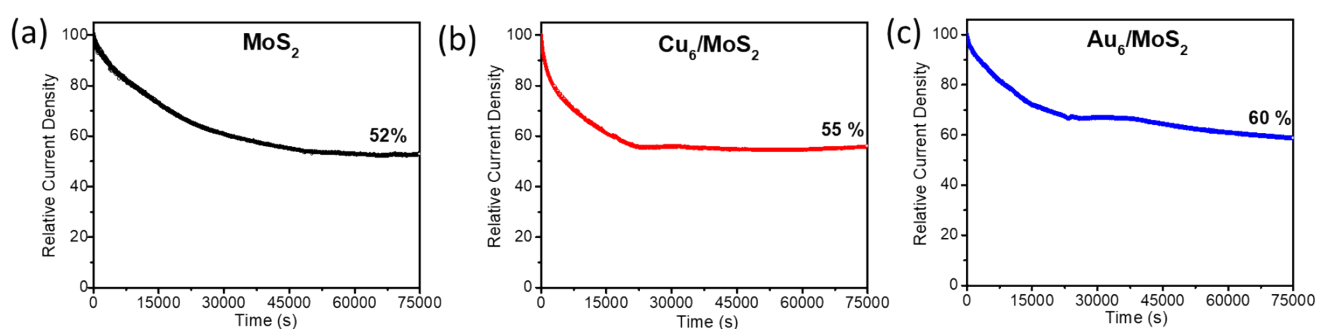

**Figure S22:** Chronoamperometry measurements of (a) MoS<sub>2</sub> (b) Cu<sub>6</sub>/MoS<sub>2</sub> (c) Au<sub>6</sub>/MoS<sub>2</sub>

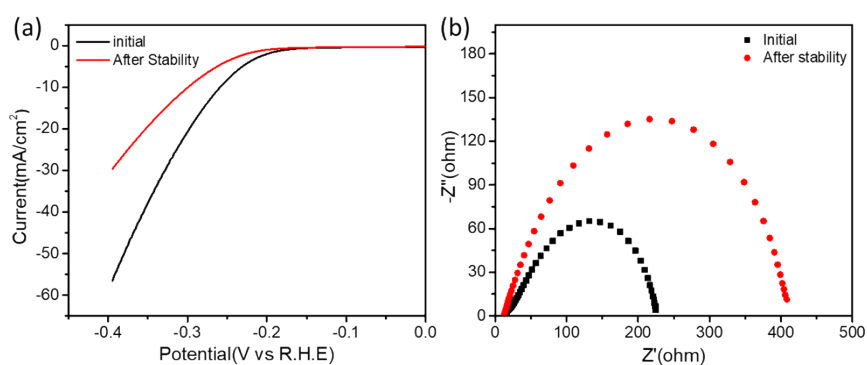

**Figure S23:** (a) HER polarization curve and (b) Nyquist plot curve of MoS<sub>2</sub> before and after stability test.

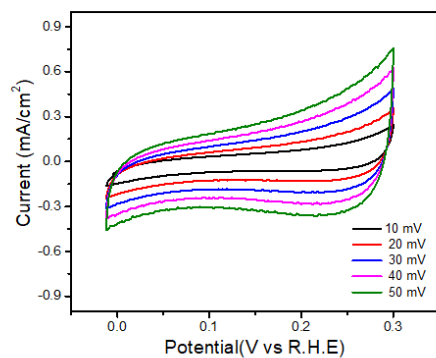

**Figure S24:** Cyclic voltammograms curve Au<sub>4</sub>Cu<sub>2</sub>/MoS<sub>2</sub> recorded after stability test.

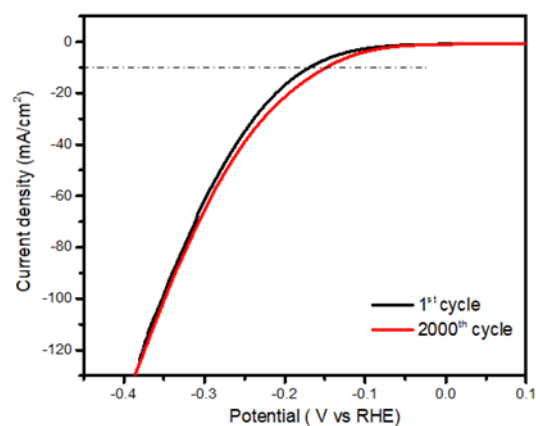

**Figure S25:** LSV cycling stability of Au<sub>4</sub>Cu<sub>2</sub>/MoS<sub>2</sub> upto 2000<sup>th</sup> LSV performance.

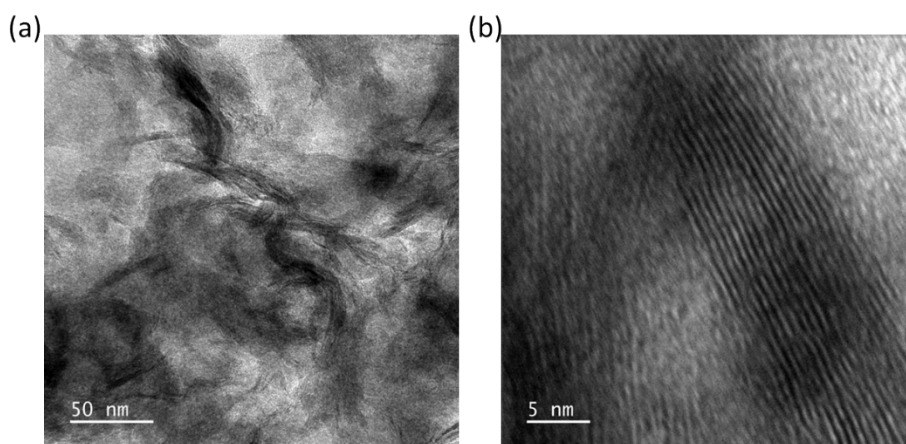

**Figure S26:** (a) TEM and (b) HRTEM images of  $\text{Au}_4\text{Cu}_2/\text{MoS}_2$  after catalysis.

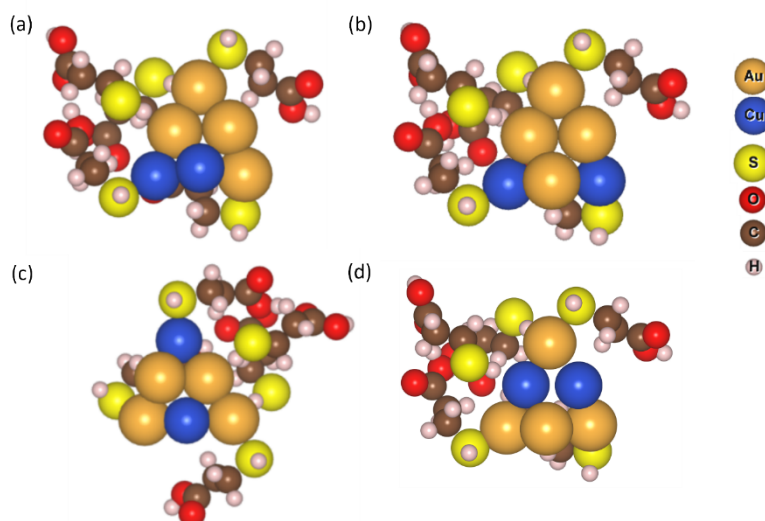

**Figure S27:** Possible arrangements of Cu and Au positions in  $\text{Au}_4\text{Cu}_2(\text{MPA})_5$  cluster named as:

(a) A12, (b) A13, (c) A14 and (d) A13'.

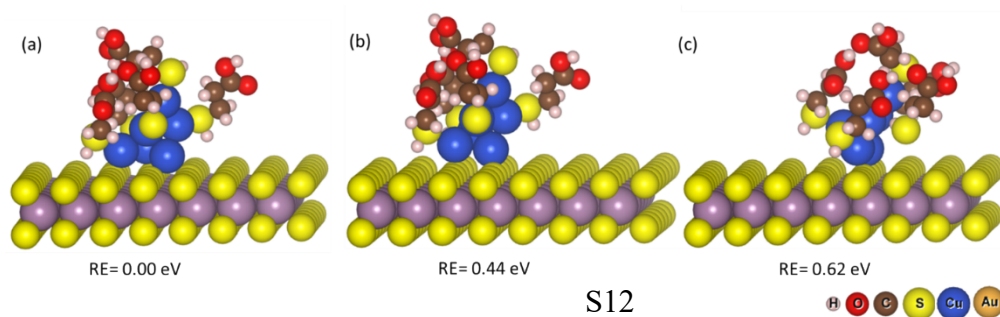

S12

**Figure S28:** Side view of the possible orientations of  $\text{Cu}_6(\text{MPA})_5$  cluster on  $\text{MoS}_2$  and their

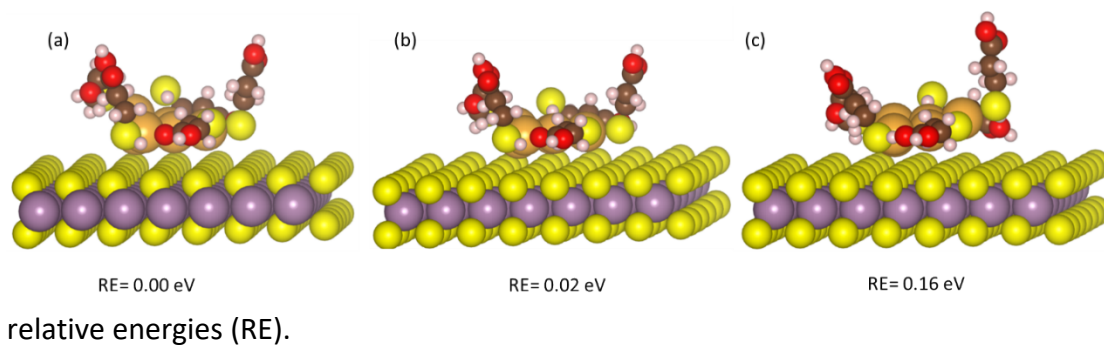

**Figure S29:** Side view of the possible sites of  $\text{Au}_6(\text{MPA})_5$  cluster on  $\text{MoS}_2$  and their relative energies (RE).

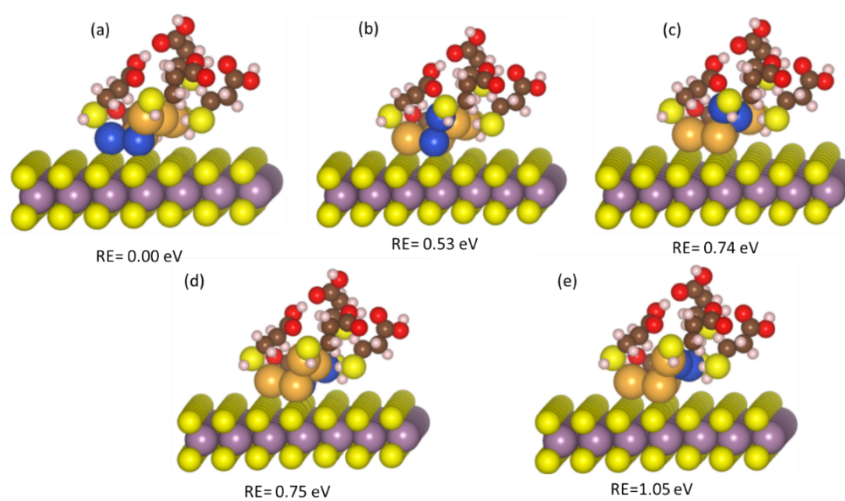

**Figure S30:** Side view of the possible orientations of  $\text{Au}_4\text{Cu}_2(\text{MPA})_5$  cluster on  $\text{MoS}_2$  and their relative energies (RE).

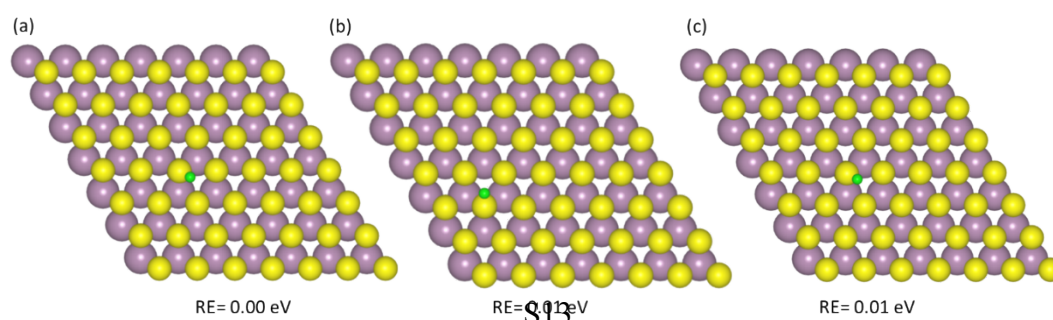

**Figure S31:** Top view of the possible orientations of MoS<sub>2</sub> for H-adsorption and their relative energies (RE).

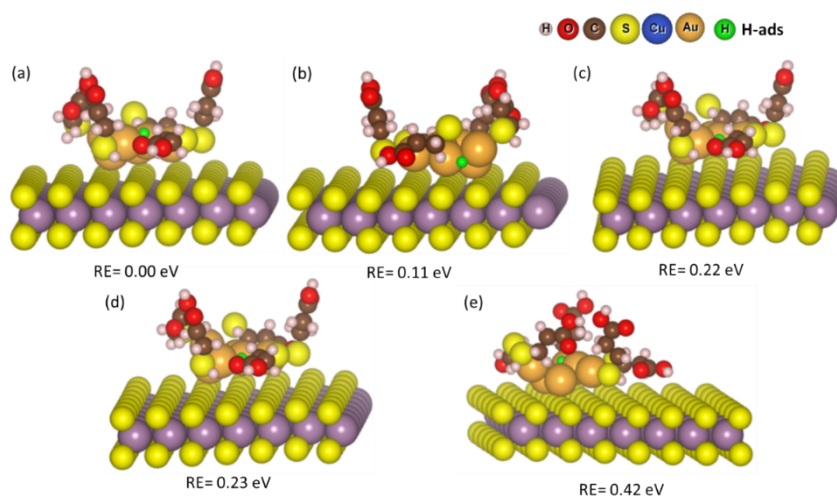

**Figure S32:** Side view of the possible orientations of H-adsorption on Au<sub>6</sub>(MPA)<sub>5</sub>/MoS<sub>2</sub> and their relative energies (RE).

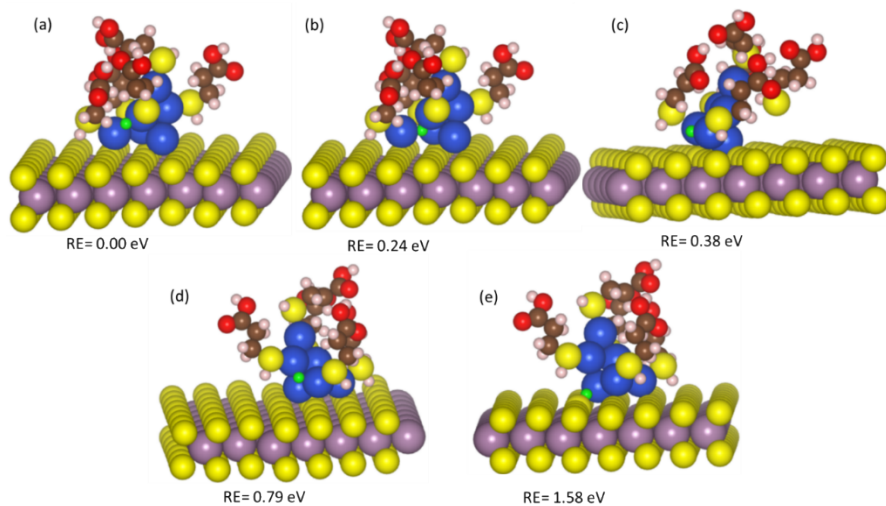

**Figure S33:** Side view of the possible orientations of H-adsorption on Cu<sub>6</sub>(MPA)<sub>5</sub>/MoS<sub>2</sub> and their relative energies (RE).

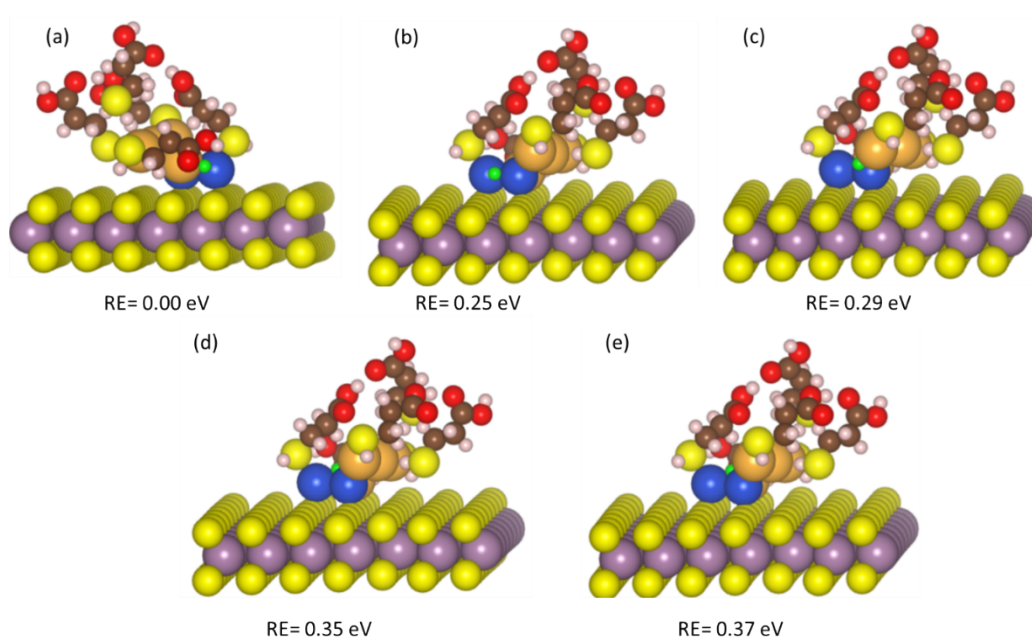

**Figure S34:** Side view of the possible orientations of H-adsorption on Au<sub>4</sub>Cu<sub>2</sub>(MPA)<sub>5</sub>/MoS<sub>2</sub> and their relative energies (RE).

**Table S1:** Summary of HER overpotential, Tafel slope, double-layer capacitance, electrochemically active surface area, and charge-transfer resistance of Au<sub>4</sub>Cu<sub>2</sub>/MoS<sub>2</sub>

| Catalyst Name                                                                 | Electrolyte                              | Overpotential @10 mAcm <sup>-2</sup> (mV) | Reference        |
|-------------------------------------------------------------------------------|------------------------------------------|-------------------------------------------|------------------|
| S-Au MoS <sub>2</sub> hybrid                                                  | 0.5 M H <sub>2</sub> SO <sub>4</sub>     | 164                                       | 1                |
| Ag/VA-MoS <sub>2</sub> +20 min Pd G.R                                         | 0.5 M H <sub>2</sub> SO <sub>4</sub>     | 210                                       | 2                |
| Au <sub>11</sub> NCs/MoS <sub>2</sub>                                         | 0.5 M H <sub>2</sub> SO <sub>4</sub>     | 292                                       | 3                |
| Au <sub>25</sub> NCs/MoS <sub>2</sub>                                         | 0.5 M H <sub>2</sub> SO <sub>4</sub>     | 280                                       | 4                |
| Au <sub>2</sub> Pd <sub>6</sub> NCs/MoS <sub>2</sub>                          | 0.5 M H <sub>2</sub> SO <sub>4</sub>     | 225                                       | 5                |
| Au <sub>24</sub> Ag <sub>20</sub> ( t BuPh-CuC) <sub>24</sub> Cl <sub>2</sub> | 0.5 M H <sub>2</sub> SO <sub>4</sub>     | 260                                       | 6                |
| Ag NCs/MoS <sub>2</sub>                                                       | 0.5 M H <sub>2</sub> SO <sub>4</sub>     | 230                                       | 7                |
| Pd <sub>6</sub> cluster/AC-V                                                  | 0.5 M H <sub>2</sub> SO <sub>4</sub>     | 400                                       | 8                |
| Pt NCs@ CIAC-121                                                              | 0.5 M H <sub>2</sub> SO <sub>4</sub>     | 485                                       | 9                |
| <b>Au<sub>4</sub>Cu<sub>2</sub> NCs/MoS<sub>2</sub></b>                       | <b>0.5 M H<sub>2</sub>SO<sub>4</sub></b> | <b>155</b>                                | <b>This work</b> |

  

| Sample                                                    | Overpotential @ 10 mA/cm <sup>-2</sup> (mV vs. RHE) | Tafel Slope (mv/dec) | Double layer capacitance C <sub>dl</sub> (mF/cm <sup>2</sup> ) | Electrochemically active surface area, ECSA (cm <sup>2</sup> ) | Charge Transfer resistance, R <sub>ct</sub> (ohm) |
|-----------------------------------------------------------|-----------------------------------------------------|----------------------|----------------------------------------------------------------|----------------------------------------------------------------|---------------------------------------------------|
| MoS <sub>2</sub>                                          | 252                                                 | 116                  | 2.4                                                            | 60                                                             | 210                                               |
| 0.5 wt% Au <sub>4</sub> Cu <sub>2</sub> /MoS <sub>2</sub> | 236                                                 | 97                   | 3.6                                                            | 90                                                             | 151                                               |
| 1 wt% Au <sub>4</sub> Cu <sub>2</sub> /MoS <sub>2</sub>   | 192                                                 | 84                   | 5.1                                                            | 127.5                                                          | 54                                                |
| 2 wt% Au <sub>4</sub> Cu <sub>2</sub> /MoS <sub>2</sub>   | 155                                                 | 78                   | 10.2                                                           | 255                                                            | 39                                                |
| 4 wt% Au <sub>4</sub> Cu <sub>2</sub> /MoS <sub>2</sub>   | 238                                                 | 106                  | 2.6                                                            | 65                                                             | 162                                               |

**Table S2:** Comparison of Au<sub>4</sub>Cu<sub>2</sub>/MoS<sub>2</sub> catalyst with the state-of-the-art catalysts developed in the recent past.



## References

1. R. Bar-Ziv, P. Ranjan, A. Lavie, A. Jain, S. Garai, A. Bar Hen, R. Popovitz-Biro, R. Tenne, R. Arenal, A. Ramasubramaniam, L. Lajaunie and M. Bar-Sadan, *ACS Appl. Energy Mater.*, 2019, **2**, 6043-6050.
2. I. Gerlitz, M. Fiegenbaum-Raz, M. Bar-Sadan, H. Cohen, A. Ismach and B. A. Rosen, *ChemElectroChem*, 2020, **7**, 4224-4232.
3. S. Gratiou, A. Karmakar, D. Kumar, S. Kundu, S. Chakraborty and S. Mandal, *Nanoscale*, 2022, **14**, 7919-7926.
4. S. Zhao, R. Jin, Y. Song, H. Zhang, S. D. House, J. C. Yang and R. Jin, *Small*, 2017, **13**, 1701519.
5. Y. Du, J. Xiang, K. Ni, Y. Yun, G. Sun, X. Yuan, H. Sheng, Y. Zhu and M. Zhu, *Inorg. Chem. Front.*, 2018, **5**, 2948-2954.
6. Y. Tang, F. Sun, X. Ma, L. Qin, G. Ma, Q. Tang and Z. Tang, *Dalt. Trans.*, 2022, **51**, 7845-7850.
7. M. Ghosal Chowdhury, L. Sahoo, S. Maity, D. Bain, U. K. Gautam and A. Patra, *ACS Appl. Nano Mater.*, 2022, **5**, 7132-7141.
8. X. Gao and W. Chen, *Chem. Commun.*, 2017, **53**, 9733-9736.
9. S. Wang, X. Gao, X. Hang, X. Zhu, H. Han, W. Liao and W. Chen, *J. Am. Chem. Soc.*, 2016, **138**, 16236-16239.
